# Supplementary material
Source: Springer Nature journal article supplement (https://www.springermedizin.de/resource/supplementary/12906_2008_209_MOESM4_ESM.pdf/9524282)
Supplement: MOESM4 [file 9524282]

**Table 2.** PK parameter estimates of IDV before and after co-administration with AG (1 gram every 8 hours), n=13

|                                    | <b>IDV alone (Day 7)</b> | <b>IDV + AG (Day 22)</b> | <b>Day 7 / Day 22 Geometric</b> |
|------------------------------------|--------------------------|--------------------------|---------------------------------|
|                                    | <b>GM (95%CI)</b>        | <b>GM (95%CI)</b>        | <b>Mean Ratio</b>               |
|                                    |                          |                          | <b>(90% CI)</b>                 |
| <b>C<sub>max</sub> (ng/mL)</b>     | 5623 (4027-7853)         | 5633 (4908-6464)         | 1.00 (0.77-1.29)                |
| <b>C<sub>min</sub> (ng/mL)</b>     | 61.97 (42.72-89.88)      | 62.78 (39.72-99.24)      | 1.00 (0.77-1.29)                |
| <b>t<sub>max</sub> (hours)</b>     | 0.98 (0.7189-1.3403)     | 0.74 (0.5527-0.9870)     | 0.75 (0.53-1.06)                |
| <b>AUC<sub>0-8</sub> (ng·h/dL)</b> | 12171 (8628-17168)       | 10700 (8515-13649)       | 0.89 (0.72-1.08)                |
